# Supplementary material
Source: bioRxiv or medRxiv preprint supplement (https://www.biorxiv.org/highwire/filestream/110500/field_highwire_adjunct_files/4/362277-5.pdf)
Supplement: Supplementary file [file 362277-5.pdf]

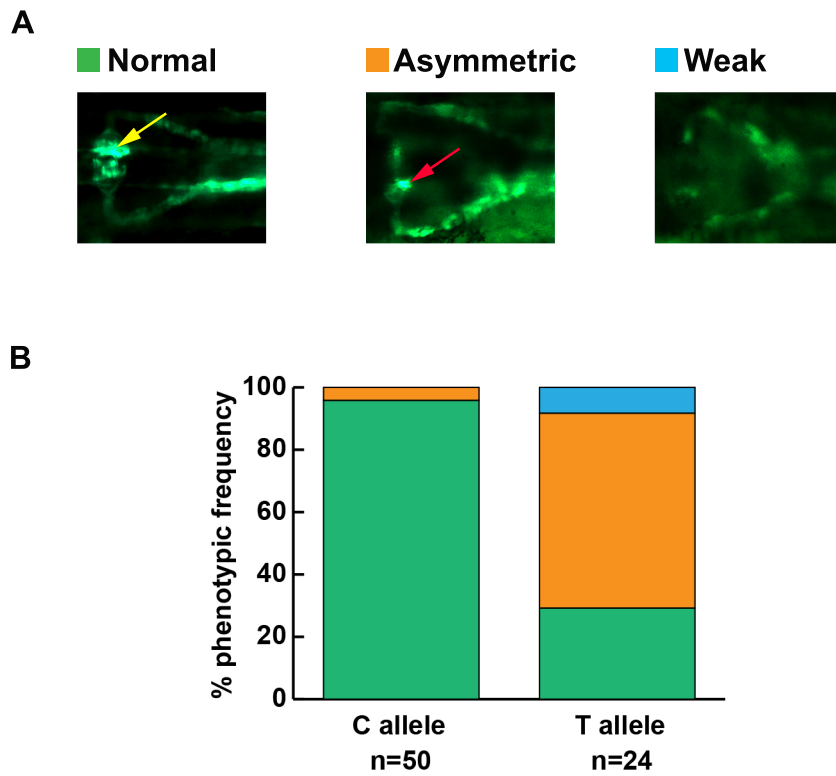

**Figure S4. Allelic differences in GFP expression in the glomeruli of transgenic zebrafish embryos.** (A) Differences in GFP expression were observed in 48 hpf F2 zebrafish embryos carrying human *rs1967017* urate-lowering C allele-GFP, and urate-raising T allele-GFP. Expression patterns were categorized into normal (yellow arrow), asymmetric (unequal expression in the glomeruli, red arrow) and weak (absent or low expression). (B) Distribution frequency of phenotypes between the two transgenic zebrafish lines (%), with absolute numbers given below the bars.
